# Supplementary material for: Stress biomarkers and child development in young children in Bangladesh
Source: PubMed Central journal article supplement (PMC11157411; doi:10.1016/j.psyneuen.2024.107023), 2024-06
Supplement: mmc1.pdf [file mmc1.pdf]

## **Supplemental Materials**

### *Appendix 1. Analysis methods and covariates*

We assessed the following baseline enrollment covariates – child birth order, maternal age, maternal height, maternal education, household food insecurity, number of children in the household, number of individuals living in the compound, distance to primary drinking water source, and a household asset score calculated via the first principal component of a principal components analysis. In addition, based on literature review and subject area knowledge, we identified time-varying covariates that were possibly associated with the outcomes of interest but were not likely to be caused by either the exposure or outcome of interest. These time-varying covariates included – prior length-for-age Z-score (LAZ, categorized), prior weight-for-age Z-score (WAZ, categorized), month of measurement, treatment arm (control, N+WSH), pre-stressor sample collection time, maternal Center for Epidemiologic Studies Depression Revised (CESD-R) Scale score,<sup>11</sup> maternal Perceived Stress Scale (PSS) score,<sup>12</sup> and maternal lifetime cumulative exposure to intimate partner violence as measured by the WHO Women’s Health and Life Experiences Survey.<sup>13</sup> Additional information regarding the rationale for covariate inclusion and temporality of assessment can be found in this study’s pre-registered analysis plan.<sup>14</sup>



Supplemental Figure 2. Distribution of child cortisol reactivity at Year 2

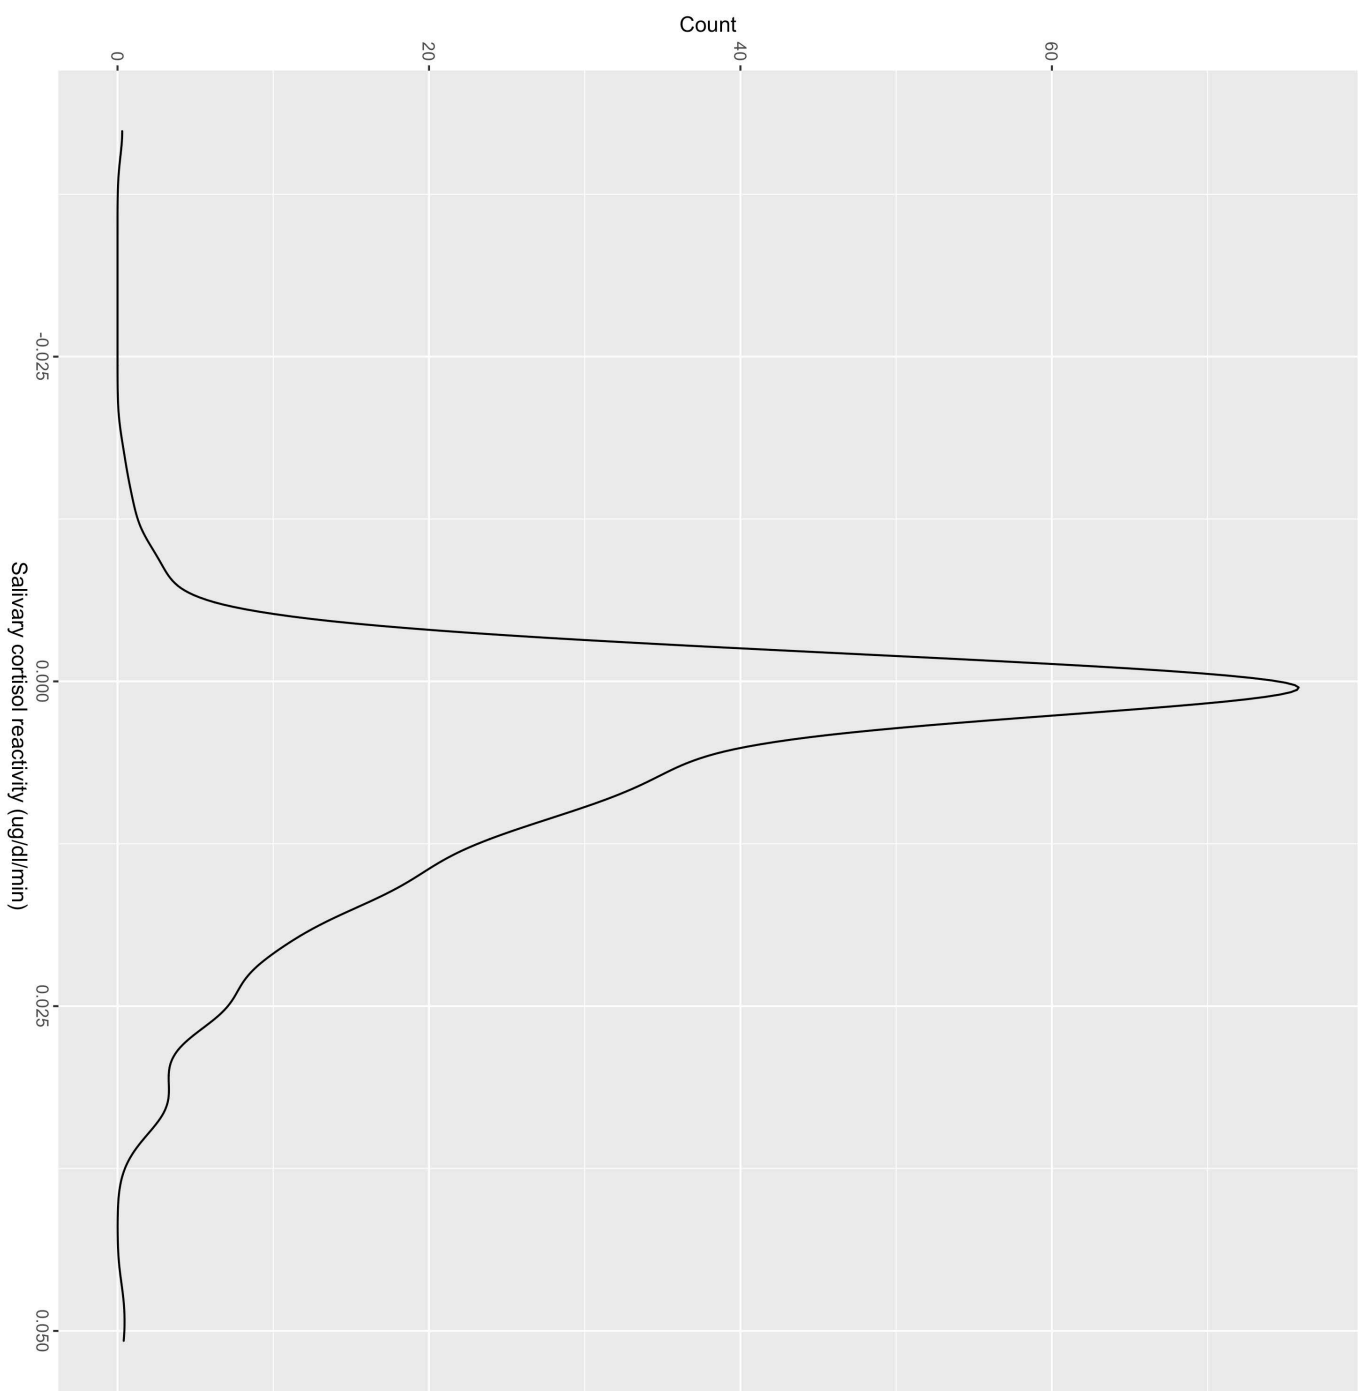

**Supplemental Figure 3. Spline curves of the associations between HPA axis biomarkers and child development at Year 2.**

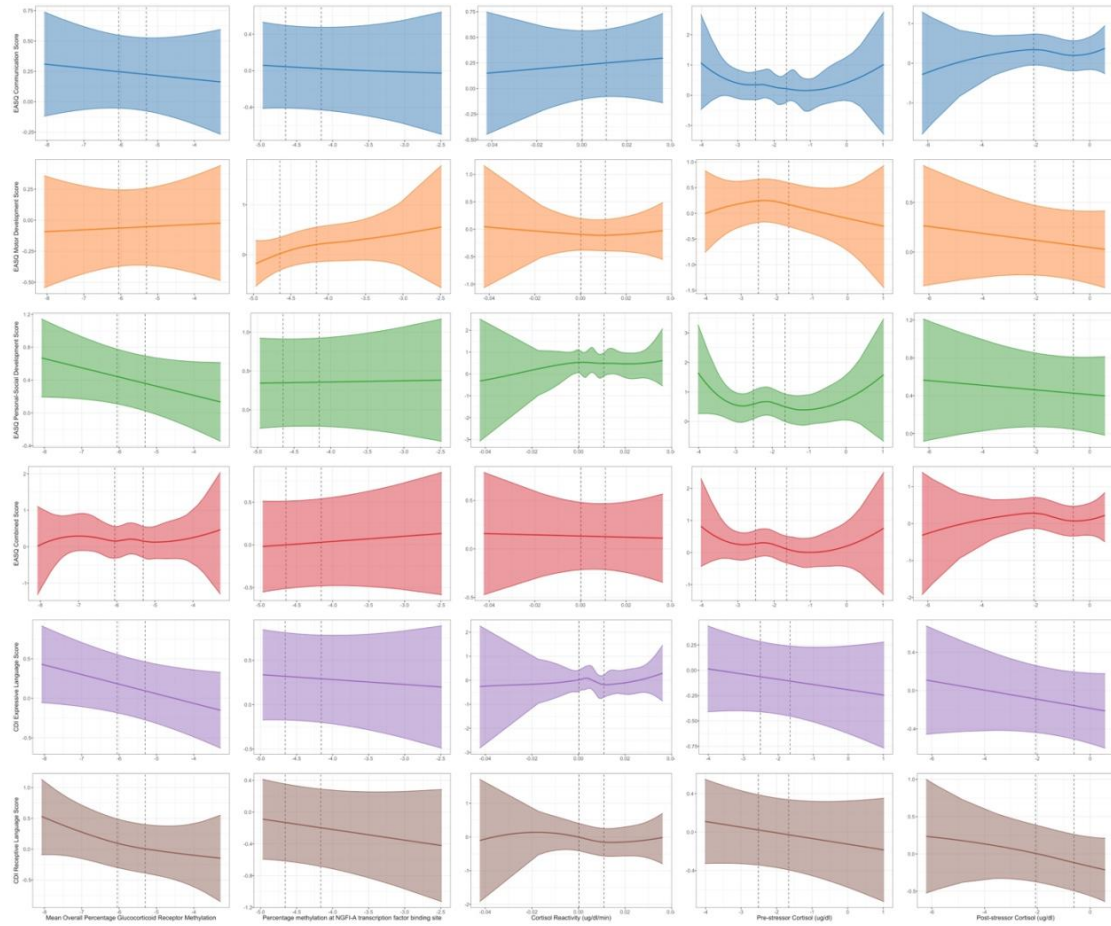

**Supplemental Figure 4. Spline curves of the associations between concurrent urinary F2 isoprostanes and child development at Year 1.**

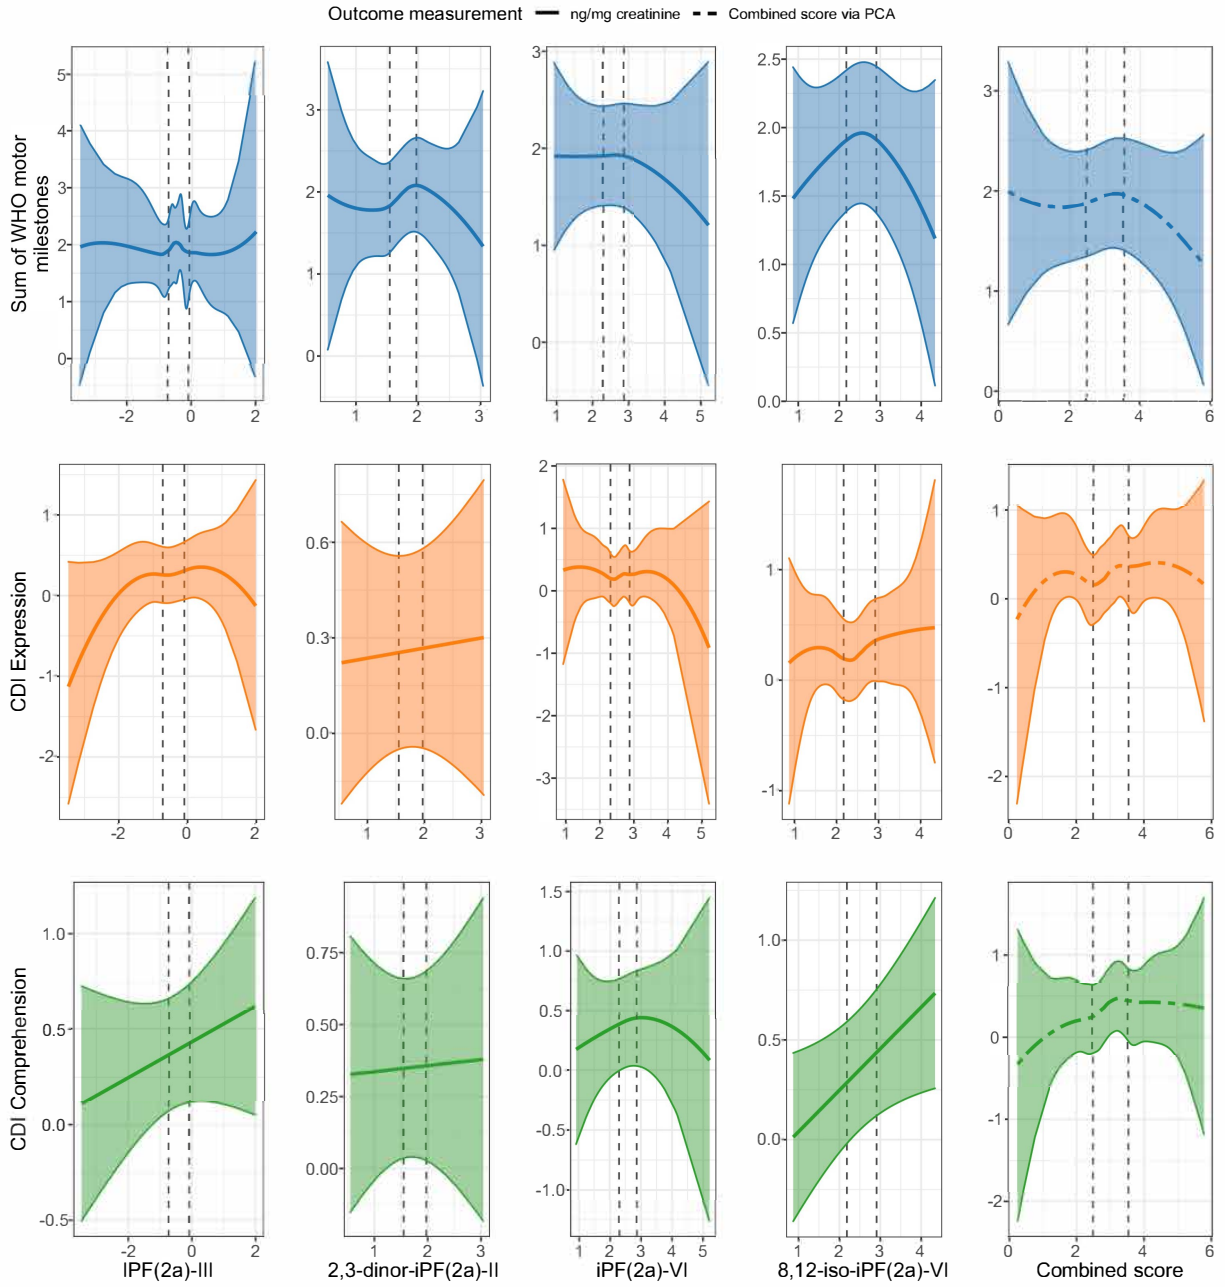

**Supplemental Table 1. Study exposures, outcomes, and hypothesized relationships**

| <b>Exposure Biological Domain and Biomarkers</b>                                                                                                                                           | <b>Outcomes</b>                                                | <b>Hypothesis</b>                                                                     |
|--------------------------------------------------------------------------------------------------------------------------------------------------------------------------------------------|----------------------------------------------------------------|---------------------------------------------------------------------------------------|
| <i>HPA axis:</i> Cortisol via concentrations pre-stressor, post-stressor, and reactivity at Year 2                                                                                         | CDI and EASQ at Year 2                                         | Cortisol concentrations and reactivity are positive correlated with child development |
| <i>HPA axis:</i> Glucocorticoid receptor methylation via percentage methylation at NGFI-A transcription factor binding site and mean overall glucocorticoid receptor methylation at Year 2 | CDI and EASQ at Year 2                                         | Glucocorticoid receptor methylation is negatively correlated with child development   |
| <i>SAM axis:</i> Salivary alpha-amylase (concentrations pre-stressor, post-stressor, and reactivity), mean arterial pressure and resting heart rate at Year 2                              | CDI and EASQ at Year 2                                         | SAM axis biomarkers are negatively associated with child development                  |
| <i>Oxidative status:</i> Individual urinary F2 isoprostane isomers and combined score at Year 1                                                                                            | WHO motor milestones and CDI at Year 1; CDI and EASQ at Year 2 | Oxidative status is inversely associated with child development                       |

CDI: MacArthur-Bates Communicative Development Inventories; EASQ: Extended Ages and Stages Questionnaire

**Supplemental Table 2. Hypothalamic-pituitary-adrenal axis biomarkers and child development at Year 2**

| Exposure                        | Outcome                       | N   | 25th Percentile | 75th Percentile | Outcome, 75th Percentile v. 25th Percentile |                                      |                      |         |
|---------------------------------|-------------------------------|-----|-----------------|-----------------|---------------------------------------------|--------------------------------------|----------------------|---------|
| Adjusted                        |                               |     |                 |                 |                                             |                                      |                      |         |
|                                 |                               |     |                 |                 | Predicted Outcome at 25th Percentile        | Predicted Outcome at 75th Percentile | Coefficient (95% CI) | P-value |
| Cortisol reactivity (µg/dl/min) | EASQ communication score      | 545 | 0               | 0.01            | 0.23                                        | 0.25                                 | 0.02 (-0.07, 0.11)   | 0.67    |
|                                 | EASQ gross motor score        | 538 | 0               | 0.01            | -0.09                                       | -0.11                                | -0.01 (-0.13, 0.1)   | 0.81    |
|                                 | EASQ personal social score    | 544 | 0               | 0.01            | 0.57                                        | 0.43                                 | -0.14 (-0.4, 0.12)   | 0.3     |
|                                 | Combined EASQ score           | 543 | 0               | 0.01            | 0.13                                        | 0.13                                 | -0.01 (-0.1, 0.09)   | 0.9     |
|                                 | CDI expressive language score | 552 | 0               | 0.01            | -0.01                                       | -0.24                                | -0.23 (-0.45, 0)     | 0.05    |
|                                 | CDI comprehension score       | 547 | 0               | 0.01            | -0.01                                       | -0.16                                | -0.15 (-0.29, -0.01) | 0.04    |
| Pre-stressor cortisol (µg/dl)   | EASQ communication score      | 588 | -2.51           | -1.66           | 0.32                                        | 0.24                                 | -0.07 (-0.32, 0.17)  | 0.57    |
|                                 | EASQ gross motor score        | 582 | -2.51           | -1.66           | 0.24                                        | 0.17                                 | -0.07 (-0.21, 0.07)  | 0.31    |
|                                 | EASQ personal social score    | 588 | -2.51           | -1.66           | 0.57                                        | 0.47                                 | -0.1 (-0.33, 0.12)   | 0.38    |
|                                 | Combined EASQ score           | 587 | -2.51           | -1.66           | 0.27                                        | 0.09                                 | -0.17 (-0.38, 0.03)  | 0.1     |
|                                 | CDI expressive language score | 595 | -2.51           | -1.66           | -0.06                                       | -0.11                                | -0.04 (-0.13, 0.05)  | 0.35    |
|                                 | CDI comprehension score       | 591 | -2.51           | -1.66           | 0.02                                        | -0.03                                | -0.05 (-0.14, 0.04)  | 0.28    |
| Post-stressor cortisol (µg/dl)  | EASQ communication score      | 550 | -2.08           | -0.61           | 0.34                                        | 0.19                                 | -0.16 (-0.32, 0.01)  | 0.06    |

| Exposure                                                                          | Outcome                       | N   | 25th Percentile | 75th Percentile | Outcome, 75th Percentile v. 25th Percentile |                                      |                      |         |
|-----------------------------------------------------------------------------------|-------------------------------|-----|-----------------|-----------------|---------------------------------------------|--------------------------------------|----------------------|---------|
| Adjusted                                                                          |                               |     |                 |                 |                                             |                                      |                      |         |
|                                                                                   |                               |     |                 |                 | Predicted Outcome at 25th Percentile        | Predicted Outcome at 75th Percentile | Coefficient (95% CI) | P-value |
|                                                                                   | EASQ gross motor score        | 543 | -2.06           | -0.61           | 0.12                                        | 0.07                                 | -0.05 (-0.17, 0.07)  | 0.42    |
|                                                                                   | EASQ personal social score    | 549 | -2.08           | -0.61           | 0.46                                        | 0.43                                 | -0.04 (-0.16, 0.09)  | 0.59    |
|                                                                                   | Combined EASQ score           | 548 | -2.07           | -0.61           | 0.29                                        | 0.07                                 | -0.22 (-0.41, -0.04) | 0.02    |
|                                                                                   | CDI expressive language score | 557 | -2.06           | -0.61           | -0.09                                       | -0.16                                | -0.07 (-0.18, 0.04)  | 0.24    |
|                                                                                   | CDI comprehension score       | 552 | -2.07           | -0.61           | 0.01                                        | -0.12                                | -0.12 (-0.24, -0.01) | 0.04    |
| Mean overall percentage glucocorticoid receptor methylation                       | EASQ communication score      | 557 | -6.05           | -5.31           | 0.25                                        | 0.22                                 | -0.02 (-0.1, 0.06)   | 0.58    |
|                                                                                   | EASQ gross motor score        | 551 | -6.05           | -5.3            | -0.06                                       | -0.05                                | 0.01 (-0.08, 0.1)    | 0.82    |
|                                                                                   | EASQ personal social score    | 557 | -6.05           | -5.31           | 0.44                                        | 0.36                                 | -0.08 (-0.17, 0.01)  | 0.07    |
|                                                                                   | Combined EASQ score           | 556 | -6.05           | -5.3            | 0.12                                        | 0.13                                 | 0.01 (-0.21, 0.23)   | 0.95    |
|                                                                                   | CDI expressive language score | 563 | -6.05           | -5.3            | 0.18                                        | 0.09                                 | -0.09 (-0.17, -0.01) | 0.03    |
|                                                                                   | CDI comprehension score       | 559 | -6.05           | -5.3            | 0.1                                         | 0.01                                 | -0.09 (-0.19, 0.01)  | 0.07    |
| Percentage methylation at NGFI-A transcription factor binding site (CpG site #12) | EASQ communication score      | 339 | -4.65           | -4.16           | 0.04                                        | 0.02                                 | -0.02 (-0.13, 0.09)  | 0.71    |
|                                                                                   | EASQ gross motor score        | 333 | -4.65           | -4.16           | 0.02                                        | 0.2                                  | 0.18 (0, 0.37)       | 0.05    |



| Exposure | Outcome                       | N   | 25th Percentile | 75th Percentile | Outcome, 75th Percentile v. 25th Percentile |                                      |                      |         |
|----------|-------------------------------|-----|-----------------|-----------------|---------------------------------------------|--------------------------------------|----------------------|---------|
| Adjusted |                               |     |                 |                 |                                             |                                      |                      |         |
|          |                               |     |                 |                 | Predicted Outcome at 25th Percentile        | Predicted Outcome at 75th Percentile | Coefficient (95% CI) | P-value |
|          | EASQ personal social score    | 339 | -4.65           | -4.16           | 0.35                                        | 0.36                                 | 0.01 (-0.11, 0.13)   | 0.9     |
|          | Combined EASQ score           | 338 | -4.65           | -4.16           | 0                                           | 0.03                                 | 0.03 (-0.08, 0.14)   | 0.62    |
|          | CDI expressive language score | 342 | -4.66           | -4.16           | 0.32                                        | 0.29                                 | -0.03 (-0.14, 0.08)  | 0.63    |
|          | CDI comprehension score       | 339 | -4.66           | -4.16           | -0.13                                       | -0.2                                 | -0.07 (-0.18, 0.05)  | 0.26    |

Analyses adjusted for child age and child sex, and screened the following covariates for potential inclusion (see Appendix 3 for details) -- child birth order, maternal age, maternal height, maternal education, household food insecurity, number of children in the household, number of individuals living in the compound, distance to primary drinking water source, household assets, prior anthropometry, month of assessment, treatment arm, pre-stressor sample collection time, maternal Center for Epidemiologic Studies Depression Revised Scale score, maternal Perceived Stress Scale score, and maternal lifetime cumulative exposure to intimate partner violence.

\* P-value < 0.2 after adjusting for multiple comparisons using the Benjamini-Hochberg procedure

**Supplemental Table 3. Sympathetic adrenomedullary axis biomarkers and child development at Year 2**

| Exposure                                     | Outcome                       | N   | 25th Percentile | 75th Percentile | Outcome, 75th Percentile v. 25th Percentile |                                      |                      |         |
|----------------------------------------------|-------------------------------|-----|-----------------|-----------------|---------------------------------------------|--------------------------------------|----------------------|---------|
| Adjusted                                     |                               |     |                 |                 |                                             |                                      |                      |         |
|                                              |                               |     |                 |                 | Predicted Outcome at 25th Percentile        | Predicted Outcome at 75th Percentile | Coefficient (95% CI) | P-value |
| Salivary alpha-amylase reactivity (U/ml/min) | EASQ communication score      | 561 | -0.08           | 4.61            | 0.11                                        | 0.13                                 | 0.02 (-0.04, 0.07)   | 0.57    |
|                                              | EASQ gross motor score        | 555 | -0.08           | 4.54            | -0.08                                       | -0.05                                | 0.04 (-0.03, 0.1)    | 0.26    |
|                                              | EASQ personal social score    | 560 | -0.08           | 4.61            | 0.32                                        | 0.37                                 | 0.06 (-0.18, 0.3)    | 0.65    |
|                                              | Combined EASQ score           | 559 | -0.08           | 4.6             | 0.03                                        | 0.18                                 | 0.15 (-0.06, 0.36)   | 0.16    |
|                                              | CDI expressive language score | 568 | -0.08           | 4.52            | -0.2                                        | -0.18                                | 0.02 (-0.03, 0.08)   | 0.45    |
|                                              | CDI comprehension score       | 564 | -0.08           | 4.49            | -0.05                                       | -0.02                                | 0.03 (-0.03, 0.09)   | 0.29    |
| Pre-stressor salivary alpha-amylase (U/ml)   | EASQ communication score      | 584 | 3.5             | 4.64            | 0.25                                        | 0.17                                 | -0.09 (-0.18, 0.01)  | 0.07    |
|                                              | EASQ gross motor score        | 578 | 3.5             | 4.65            | 0.04                                        | -0.14                                | -0.18 (-0.35, 0)     | 0.04    |
|                                              | EASQ personal social score    | 584 | 3.5             | 4.65            | 0.45                                        | 0.43                                 | -0.02 (-0.23, 0.19)  | 0.84    |
|                                              | Combined EASQ score           | 583 | 3.5             | 4.65            | 0.23                                        | 0.04                                 | -0.19 (-0.4, 0.02)   | 0.07    |
|                                              | CDI expressive language score | 591 | 3.51            | 4.64            | -0.1                                        | -0.16                                | -0.07 (-0.22, 0.08)  | 0.39    |
|                                              | CDI comprehension score       | 587 | 3.5             | 4.65            | 0.05                                        | 0.01                                 | -0.04 (-0.15, 0.06)  | 0.42    |

| Exposure                                    | Outcome                       | N    | 25th Percentile | 75th Percentile | Outcome, 75th Percentile v. 25th Percentile |                                      |                      |         |
|---------------------------------------------|-------------------------------|------|-----------------|-----------------|---------------------------------------------|--------------------------------------|----------------------|---------|
| Adjusted                                    |                               |      |                 |                 |                                             |                                      |                      |         |
|                                             |                               |      |                 |                 | Predicted Outcome at 25th Percentile        | Predicted Outcome at 75th Percentile | Coefficient (95% CI) | P-value |
| Post-stressor salivary alpha-amylase (U/ml) | EASQ communication score      | 571  | 3.94            | 5.17            | 0.22                                        | 0.22                                 | 0 (-0.1, 0.09)       | 0.98    |
|                                             | EASQ gross motor score        | 565  | 3.94            | 5.16            | 0.21                                        | 0.19                                 | -0.02 (-0.12, 0.09)  | 0.78    |
|                                             | EASQ personal social score    | 570  | 3.94            | 5.17            | 0.45                                        | 0.47                                 | 0.02 (-0.08, 0.13)   | 0.66    |
|                                             | Combined EASQ score           | 569  | 3.94            | 5.17            | 0.18                                        | 0.19                                 | 0.01 (-0.09, 0.11)   | 0.9     |
|                                             | CDI expressive language score | 578  | 3.94            | 5.16            | -0.19                                       | -0.16                                | 0.03 (-0.06, 0.13)   | 0.53    |
|                                             | CDI comprehension score       | 574  | 3.94            | 5.16            | -0.08                                       | -0.04                                | 0.04 (-0.05, 0.14)   | 0.37    |
| Mean arterial pressure (mmHg)               | EASQ communication score      | 1196 | 60.89           | 69              | -0.18                                       | -0.13                                | 0.04 (-0.04, 0.12)   | 0.29    |
|                                             | EASQ gross motor score        | 1176 | 60.89           | 69              | 0.38                                        | 0.4                                  | 0.02 (-0.04, 0.09)   | 0.49    |
|                                             | EASQ personal social score    | 1194 | 60.89           | 69              | 0.04                                        | -0.04                                | -0.08 (-0.26, 0.09)  | 0.35    |
|                                             | Combined EASQ score           | 1191 | 60.89           | 69              | 0.07                                        | 0.09                                 | 0.02 (-0.14, 0.17)   | 0.85    |
|                                             | CDI expressive language score | 1209 | 60.89           | 69              | -0.02                                       | 0.07                                 | 0.09 (-0.08, 0.25)   | 0.31    |
|                                             | CDI comprehension score       | 1195 | 60.94           | 69              | 0.02                                        | 0.01                                 | -0.01 (-0.16, 0.15)  | 0.92    |
| Mean resting heart rate (bpm)               | EASQ communication score      | 1198 | 99.33           | 118.33          | -0.15                                       | -0.15                                | -0.01 (-0.07, 0.06)  | 0.89    |

| Exposure | Outcome                       | N    | 25th Percentile | 75th Percentile | Outcome, 75th Percentile v. 25th Percentile |                                      |                      |         |
|----------|-------------------------------|------|-----------------|-----------------|---------------------------------------------|--------------------------------------|----------------------|---------|
| Adjusted |                               |      |                 |                 |                                             |                                      |                      |         |
|          |                               |      |                 |                 | Predicted Outcome at 25th Percentile        | Predicted Outcome at 75th Percentile | Coefficient (95% CI) | P-value |
|          | EASQ gross motor score        | 1178 | 99.33           | 118.33          | 0.39                                        | 0.37                                 | -0.02 (-0.08, 0.05)  | 0.58    |
|          | EASQ personal social score    | 1196 | 99.33           | 118.33          | 0.03                                        | -0.07                                | -0.1 (-0.25, 0.06)   | 0.23    |
|          | Combined EASQ score           | 1193 | 99.33           | 118.33          | -0.09                                       | -0.11                                | -0.02 (-0.1, 0.06)   | 0.68    |
|          | CDI expressive language score | 1211 | 99.33           | 118.5           | 0.01                                        | -0.03                                | -0.04 (-0.11, 0.02)  | 0.18    |
|          | CDI comprehension score       | 1196 | 99.33           | 118.33          | -0.01                                       | -0.04                                | -0.03 (-0.09, 0.03)  | 0.27    |

Analyses adjusted for child age and child sex, and screened the following covariates for potential inclusion (see Appendix 3 for details) -- child birth order, maternal age, maternal height, maternal education, household food insecurity, number of children in the household, number of individuals living in the compound, distance to primary drinking water source, household assets, prior anthropometry, month of assessment, treatment arm, pre-stressor sample collection time, maternal Center for Epidemiologic Studies Depression Revised Scale score, maternal Perceived Stress Scale score, and maternal lifetime cumulative exposure to intimate partner violence.

\* P-value < 0.2 after adjusting for multiple comparisons using the Benjamini-Hochberg procedure

**Supplemental Table 4. F2-isoprostanes and child development at Year 1**

| Exposure                                          | Outcome                                            | N   | 25th Percentile | 75th Percentile | Outcome, 75th Percentile v. 25th Percentile |                                      |                      |         |
|---------------------------------------------------|----------------------------------------------------|-----|-----------------|-----------------|---------------------------------------------|--------------------------------------|----------------------|---------|
| Adjusted                                          |                                                    |     |                 |                 |                                             |                                      |                      |         |
|                                                   |                                                    |     |                 |                 | Predicted Outcome at 25th Percentile        | Predicted Outcome at 75th Percentile | Coefficient (95% CI) | P-value |
| iPF(2 $\alpha$ )-III (ng/mg creatinine)           | Sum of 2nd, 4th, 5th, and 6th WHO motor milestones | 571 | -0.73           | -0.09           | 1.84                                        | 1.79                                 | -0.05 (-0.37, 0.27)  | 0.77    |
|                                                   | CDI expressive language Z-score                    | 672 | -0.72           | -0.09           | 0.26                                        | 0.31                                 | 0.05 (-0.1, 0.2)     | 0.52    |
|                                                   | CDI comprehension Z-score                          | 576 | -0.73           | -0.09           | 0.37                                        | 0.43                                 | 0.06 (-0.04, 0.16)   | 0.24    |
| 2,3-dinor-iPF(2 $\alpha$ )-III (ng/mg creatinine) | Sum of 2nd, 4th, 5th, and 6th WHO motor milestones | 571 | 1.54            | 1.97            | 1.81                                        | 2.09                                 | 0.27 (0.04, 0.51)    | 0.02    |
|                                                   | CDI expressive language Z-score                    | 672 | 1.55            | 1.97            | 0.25                                        | 0.27                                 | 0.01 (-0.09, 0.11)   | 0.8     |
|                                                   | CDI comprehension Z-score                          | 576 | 1.55            | 1.97            | 0.35                                        | 0.36                                 | 0.01 (-0.11, 0.12)   | 0.89    |
| iPF(2 $\alpha$ )-VI (ng/mg creatinine)            | Sum of 2nd, 4th, 5th, and 6th WHO motor milestones | 571 | 2.3             | 2.87            | 1.92                                        | 1.92                                 | 0 (-0.15, 0.15)      | 0.98    |
|                                                   | CDI expressive language Z-score                    | 672 | 2.31            | 2.87            | 0.2                                         | 0.22                                 | 0.02 (-0.2, 0.24)    | 0.86    |
|                                                   | CDI comprehension Z-score                          | 576 | 2.3             | 2.87            | 0.38                                        | 0.43                                 | 0.05 (-0.08, 0.18)   | 0.43    |

| Exposure                                        | Outcome                                            | N   | 25th Percentile | 75th Percentile | Outcome, 75th Percentile v. 25th Percentile |                                      |                      |         |
|-------------------------------------------------|----------------------------------------------------|-----|-----------------|-----------------|---------------------------------------------|--------------------------------------|----------------------|---------|
| Adjusted                                        |                                                    |     |                 |                 |                                             |                                      |                      |         |
|                                                 |                                                    |     |                 |                 | Predicted Outcome at 25th Percentile        | Predicted Outcome at 75th Percentile | Coefficient (95% CI) | P-value |
| 8,12-iso-iPF(2 $\alpha$ )-VI (ng/mg creatinine) | Sum of 2nd, 4th, 5th, and 6th WHO motor milestones | 571 | 2.17            | 2.91            | 1.9                                         | 1.91                                 | 0.01 (-0.17, 0.19)   | 0.94    |
|                                                 | CDI expressive language Z-score                    | 672 | 2.17            | 2.92            | 0.19                                        | 0.36                                 | 0.17 (-0.03, 0.38)   | 0.09    |
|                                                 | CDI comprehension Z-score                          | 576 | 2.18            | 2.91            | 0.29                                        | 0.44                                 | 0.15 (0.04, 0.27)    | 0.01    |
| Combined F2-isoprostanes score                  | Sum of 2nd, 4th, 5th, and 6th WHO motor milestones | 571 | 2.48            | 3.54            | 1.88                                        | 1.96                                 | 0.09 (-0.11, 0.29)   | 0.41    |
|                                                 | CDI expressive language Z-score                    | 672 | 2.5             | 3.55            | 0.1                                         | 0.31                                 | 0.21 (-0.03, 0.44)   | 0.08    |
|                                                 | CDI comprehension Z-score                          | 576 | 2.48            | 3.54            | 0.22                                        | 0.4                                  | 0.18 (-0.08, 0.44)   | 0.18    |

Analyses adjusted for child age and child sex, and screened the following covariates for potential inclusion (see Appendix 3 for details) -- child birth order, maternal age, maternal height, maternal education, household food insecurity, number of children in the household, number of individuals living in the compound, distance to primary drinking water source, household assets, prior anthropometry, month of assessment, treatment arm, pre-stressor sample collection time, maternal Center for Epidemiologic Studies Depression Revised Scale score, maternal Perceived Stress Scale score, and maternal lifetime cumulative exposure to intimate partner violence.

\* P-value < 0.2 after adjusting for multiple comparisons using the Benjamini-Hochberg procedure

**Supplemental Table 5. F2-isoprostanes at Year 1 and child development at Year 2**

| Exposure                                          | Outcome                       | N   | 25th Percentile | 75th Percentile | Outcome, 75th Percentile v. 25th Percentile |                                      |                      |         |
|---------------------------------------------------|-------------------------------|-----|-----------------|-----------------|---------------------------------------------|--------------------------------------|----------------------|---------|
| Adjusted                                          |                               |     |                 |                 |                                             |                                      |                      |         |
|                                                   |                               |     |                 |                 | Predicted Outcome at 25th Percentile        | Predicted Outcome at 75th Percentile | Coefficient (95% CI) | P-value |
| iPF(2 $\alpha$ )-III (ng/mg creatinine)           | EASQ communication score      | 551 | -0.74           | -0.09           | 0.19                                        | 0.21                                 | 0.01 (-0.07, 0.1)    | 0.79    |
|                                                   | EASQ gross motor score        | 546 | -0.73           | -0.09           | 0.32                                        | 0.24                                 | -0.08 (-0.18, 0.01)  | 0.08    |
|                                                   | EASQ personal social score    | 551 | -0.73           | -0.09           | 0.42                                        | 0.41                                 | 0 (-0.12, 0.11)      | 0.97    |
|                                                   | Combined EASQ score           | 550 | -0.73           | -0.09           | 0.23                                        | 0.21                                 | -0.01 (-0.1, 0.08)   | 0.8     |
|                                                   | CDI expressive language score | 558 | -0.74           | -0.09           | 0                                           | 0.05                                 | 0.04 (-0.04, 0.13)   | 0.34    |
|                                                   | CDI comprehension score       | 554 | -0.73           | -0.09           | 0.07                                        | 0.13                                 | 0.06 (-0.03, 0.15)   | 0.21    |
| 2,3-dinor-iPF(2 $\alpha$ )-III (ng/mg creatinine) | EASQ communication score      | 551 | 1.54            | 1.97            | 0.21                                        | 0.17                                 | -0.04 (-0.15, 0.07)  | 0.49    |
|                                                   | EASQ gross motor score        | 546 | 1.54            | 1.97            | 0.37                                        | 0.29                                 | -0.08 (-0.34, 0.18)  | 0.55    |
|                                                   | EASQ personal social score    | 551 | 1.54            | 1.97            | 0.42                                        | 0.35                                 | -0.07 (-0.22, 0.08)  | 0.38    |
|                                                   | Combined EASQ score           | 550 | 1.54            | 1.97            | 0.21                                        | 0.12                                 | -0.09 (-0.22, 0.05)  | 0.21    |
|                                                   | CDI expressive language score | 558 | 1.54            | 1.97            | 0.01                                        | -0.03                                | -0.04 (-0.18, 0.1)   | 0.6     |
|                                                   | CDI comprehension score       | 554 | 1.54            | 1.97            | 0.08                                        | 0.05                                 | -0.03 (-0.15, 0.09)  | 0.64    |
| iPF(2 $\alpha$ )-VI (ng/mg creatinine)            | EASQ communication score      | 551 | 2.3             | 2.87            | 0.18                                        | 0.1                                  | -0.08 (-0.21, 0.04)  | 0.19    |

| Exposure                                        | Outcome                        | N                        | 25th Percentile | 75th Percentile | Outcome, 75th Percentile v. 25th Percentile |                                      |                      |                    |
|-------------------------------------------------|--------------------------------|--------------------------|-----------------|-----------------|---------------------------------------------|--------------------------------------|----------------------|--------------------|
| Adjusted                                        |                                |                          |                 |                 |                                             |                                      |                      |                    |
|                                                 |                                |                          |                 |                 | Predicted Outcome at 25th Percentile        | Predicted Outcome at 75th Percentile | Coefficient (95% CI) | P-value            |
|                                                 | EASQ gross motor score         | 546                      | 2.31            | 2.87            | 0.33                                        | 0.27                                 | -0.07 (-0.17, 0.04)  | 0.22               |
|                                                 | EASQ personal social score     | 551                      | 2.31            | 2.87            | 0.42                                        | 0.28                                 | -0.14 (-0.25, -0.03) | 0.01               |
|                                                 | Combined EASQ score            | 550                      | 2.3             | 2.87            | 0.22                                        | 0.12                                 | -0.1 (-0.23, 0.04)   | 0.15               |
|                                                 | CDI expressive language score  | 558                      | 2.3             | 2.87            | 0.01                                        | -0.07                                | -0.08 (-0.17, 0.02)  | 0.12               |
|                                                 | CDI comprehension score        | 554                      | 2.31            | 2.87            | 0.06                                        | 0.05                                 | -0.01 (-0.15, 0.13)  | 0.91               |
| 8,12-iso-iPF(2 $\alpha$ )-VI (ng/mg creatinine) | EASQ communication score       | 551                      | 2.16            | 2.91            | 0.2                                         | 0.26                                 | 0.06 (-0.07, 0.19)   | 0.36               |
|                                                 | EASQ gross motor score         | 546                      | 2.17            | 2.91            | 0.29                                        | 0.31                                 | 0.02 (-0.09, 0.13)   | 0.76               |
|                                                 | EASQ personal social score     | 551                      | 2.17            | 2.91            | 0.41                                        | 0.42                                 | 0 (-0.12, 0.12)      | 0.97               |
|                                                 | Combined EASQ score            | 550                      | 2.17            | 2.91            | 0.21                                        | 0.25                                 | 0.04 (-0.1, 0.17)    | 0.6                |
|                                                 | CDI expressive language score  | 558                      | 2.17            | 2.91            | 0.01                                        | -0.02                                | -0.03 (-0.22, 0.16)  | 0.76               |
|                                                 | CDI comprehension score        | 554                      | 2.17            | 2.91            | 0.03                                        | 0.09                                 | 0.05 (-0.13, 0.24)   | 0.57               |
|                                                 | Combined F2-isoprostanes score | EASQ communication score | 551             | 2.48            | 3.56                                        | 0.19                                 | 0.19                 | -0.01 (-0.11, 0.1) |
|                                                 | EASQ gross motor score         | 546                      | 2.49            | 3.55            | 0.32                                        | 0.27                                 | -0.06 (-0.17, 0.05)  | 0.31               |
|                                                 | EASQ personal social score     | 551                      | 2.48            | 3.56            | 0.42                                        | 0.38                                 | -0.04 (-0.16, 0.08)  | 0.49               |



| Exposure | Outcome                       | N   | 25th Percentile | 75th Percentile | Outcome, 75th Percentile v. 25th Percentile |                                      |                      |         |
|----------|-------------------------------|-----|-----------------|-----------------|---------------------------------------------|--------------------------------------|----------------------|---------|
| Adjusted |                               |     |                 |                 |                                             |                                      |                      |         |
|          |                               |     |                 |                 | Predicted Outcome at 25th Percentile        | Predicted Outcome at 75th Percentile | Coefficient (95% CI) | P-value |
|          | Combined EASQ score           | 550 | 2.48            | 3.55            | 0.23                                        | 0.19                                 | -0.04 (-0.15, 0.08)  | 0.54    |
|          | CDI expressive language score | 558 | 2.47            | 3.55            | 0                                           | 0.02                                 | 0.02 (-0.08, 0.12)   | 0.72    |
|          | CDI comprehension score       | 554 | 2.49            | 3.54            | 0.05                                        | 0.11                                 | 0.06 (-0.05, 0.17)   | 0.28    |

Analyses adjusted for child age and child sex, and screened the following covariates for potential inclusion (see Appendix 3 for details) -- child birth order, maternal age, maternal height, maternal education, household food insecurity, number of children in the household, number of individuals living in the compound, distance to primary drinking water source, household assets, prior anthropometry, month of assessment, treatment arm, pre-stressor sample collection time, maternal Center for Epidemiologic Studies Depression Revised Scale score, maternal Perceived Stress Scale score, and maternal lifetime cumulative exposure to intimate partner violence.

\* P-value < 0.2 after adjusting for multiple comparisons using the Benjamini-Hochberg procedure

**Supplemental Table 6. F2-isoprostanes and time to WHO motor milestone at Year 1**

| Exposure                                           | Outcome                       | N   | 25th Percentile | 75th Percentile | Outcome, 75th Percentile v. 25th Percentile |                       |
|----------------------------------------------------|-------------------------------|-----|-----------------|-----------------|---------------------------------------------|-----------------------|
|                                                    |                               |     |                 |                 |                                             | Adjusted              |
|                                                    |                               |     |                 |                 |                                             | Hazard Ratio (95% CI) |
|                                                    |                               |     |                 |                 |                                             | P-value               |
| iPF(2 $\alpha$ )-III (ng/mg creatinine)            | Time to sitting unsupported   | 577 | -0.73           | -0.09           | 0 (0, 7.2e+17)                              | 0.61                  |
|                                                    | Time to crawling              | 682 | -0.72           | -0.09           | 1.02 (0.91, 1.14)                           | 0.76                  |
|                                                    | Time to standing with support | 671 | -0.72           | -0.1            | 1.01 (0.88, 1.17)                           | 0.86                  |
|                                                    | Time to walking with support  | 670 | -0.72           | -0.1            | 1.03 (0.9, 1.17)                            | 0.72                  |
|                                                    | Time to standing unsupported  | 672 | -0.72           | -0.09           | 0.95 (0.65, 1.39)                           | 0.79                  |
|                                                    | Time to walking unsupported   | 679 | -0.72           | -0.09           | 1.05 (0.88, 1.25)                           | 0.6                   |
| 2,3-dinor- iPF(2 $\alpha$ )-III (ng/mg creatinine) | Time to sitting unsupported   | 577 | 1.55            | 1.97            | 0 (0, 1.18e+59)                             | 0.76                  |
|                                                    | Time to crawling              | 682 | 1.55            | 1.97            | 1 (0.72, 1.37)                              | 0.98                  |
|                                                    | Time to standing with support | 671 | 1.55            | 1.97            | 0.95 (0.81, 1.11)                           | 0.55                  |
|                                                    | Time to walking with support  | 670 | 1.55            | 1.97            | 0.97 (0.82, 1.15)                           | 0.72                  |
|                                                    | Time to standing unsupported  | 672 | 1.55            | 1.97            | 1.12 (0.93, 1.33)                           | 0.23                  |
|                                                    | Time to walking unsupported   | 679 | 1.55            | 1.97            | 1 (0.81, 1.23)                              | 1                     |
| iPF(2 $\alpha$ )-VI (ng/mg creatinine)             | Time to sitting unsupported   | 577 | 2.3             | 2.87            | 6.2e+8 (0, 8.7e+65)                         | 0.78                  |
|                                                    | Time to crawling              | 682 | 2.31            | 2.87            | 1 (0.89, 1.14)                              | 0.97                  |
|                                                    | Time to standing with support | 671 | 2.31            | 2.87            | 0.91 (0.78, 1.06)                           | 0.22                  |
|                                                    | Time to walking with support  | 670 | 2.31            | 2.87            | 1.12 (0.88, 1.42)                           | 0.35                  |
|                                                    | Time to standing unsupported  | 672 | 2.31            | 2.87            | 0.8 (0.51, 1.26)                            | 0.35                  |

| Exposure                                        | Outcome                       | N   | 25th Percentile | 75th Percentile | Outcome, 75th Percentile v. 25th Percentile |         |
|-------------------------------------------------|-------------------------------|-----|-----------------|-----------------|---------------------------------------------|---------|
| Adjusted                                        |                               |     |                 |                 |                                             |         |
|                                                 |                               |     |                 |                 | Hazard Ratio (95% CI)                       | P-value |
|                                                 | Time to walking unsupported   | 679 | 2.31            | 2.87            | 1.02 (0.76, 1.37)                           | 0.88    |
| 8,12-iso-iPF(2 $\alpha$ )-VI (ng/mg creatinine) | Time to sitting unsupported   | 577 | 2.19            | 2.91            | 0.03 (0, 2.6e+15)                           | 0.87    |
|                                                 | Time to crawling              | 682 | 2.17            | 2.92            | 0.98 (0.86, 1.12)                           | 0.79    |
|                                                 | Time to standing with support | 671 | 2.16            | 2.91            | 0.88 (0.74, 1.04)                           | 0.12    |
|                                                 | Time to walking with support  | 670 | 2.16            | 2.92            | 0.99 (0.8, 1.23)                            | 0.95    |
|                                                 | Time to standing unsupported  | 672 | 2.16            | 2.92            | 1.07 (0.79, 1.45)                           | 0.69    |
|                                                 | Time to walking unsupported   | 679 | 2.17            | 2.91            | 1.12 (0.81, 1.53)                           | 0.51    |
| Combined F2-isoprostanes score                  | Time to sitting unsupported   | 577 | 2.5             | 3.55            | 0 (0, 5.2e+14)                              | 0.52    |
|                                                 | Time to crawling              | 682 | 2.49            | 3.54            | 0.99 (0.87, 1.14)                           | 0.93    |
|                                                 | Time to standing with support | 671 | 2.48            | 3.54            | 1.12 (0.75, 1.69)                           | 0.59    |
|                                                 | Time to walking with support  | 670 | 2.48            | 3.54            | 1 (0.84, 1.2)                               | 0.98    |
|                                                 | Time to standing unsupported  | 672 | 2.48            | 3.54            | 1.2 (0.8, 1.82)                             | 0.38    |
|                                                 | Time to walking unsupported   | 679 | 2.49            | 3.54            | 0.98 (0.79, 1.22)                           | 0.87    |

Analyses adjusted for child age and child sex, and screened the following covariates for potential inclusion (see Appendix 3 for details) -- child birth order, maternal age, maternal height, maternal education, household food insecurity, number of children in the household, number of individuals living in the compound, distance to primary drinking water source, household assets, prior anthropometry, month of assessment, treatment arm, pre-stressor sample collection time, maternal Center for Epidemiologic Studies Depression Revised Scale score, maternal Perceived Stress Scale score, and maternal lifetime cumulative exposure to intimate partner violence.

\*P-value < 0.2 after adjusting for multiple comparisons using the Benjamini-Hochberg procedure

Hazard ratio could not be estimated for sitting without support since nearly all children had achieved this milestone before time of measurement

## REFERENCES

1. Lin, A. *et al.* Effects of Water, Sanitation, Handwashing, and Nutritional Interventions on Environmental Enteric Dysfunction in Young Children: A Cluster-randomized, Controlled Trial in Rural Bangladesh. *Clinical Infectious Diseases* **70**, 738–747 (2020).
2. Il'yasova, D. *et al.* Urinary biomarkers of oxidative status in a clinical model of oxidative assault. *Cancer Epidemiol Biomarkers Prev* **19**, 1506–1510 (2010).
3. Nater, U. M. & Rohleder, N. Salivary alpha-amylase as a non-invasive biomarker for the sympathetic nervous system: current state of research. *Psychoneuroendocrinology* **34**, 486–496 (2009).
4. Jansen, J., Beijers, R., Riksen-Walraven, M. & de Weerth, C. Cortisol reactivity in young infants. *Psychoneuroendocrinology* **35**, 329–338 (2010).
5. Tost, J. & Gut, I. G. DNA methylation analysis by pyrosequencing. *Nat Protoc* **2**, 2265–2275 (2007).
6. Tofail, F. *et al.* Effect of water quality, sanitation, hand washing, and nutritional interventions on child development in rural Bangladesh (WASH Benefits Bangladesh): a cluster-randomised controlled trial. *The Lancet Child & Adolescent Health* **2**, 255–268 (2018).
7. Hamadani, J. D. *et al.* Validity and Reliability of Mothers' Reports of Language Development in 1-Year-Old Children in a Large-Scale Survey in Bangladesh. *Food Nutr Bull* **31**, S198–S206 (2010).
8. WHO Motor Development Study: windows of achievement for six gross motor development milestones. *Acta Paediatr Suppl* **450**, 86–95 (2006).
9. Fernald, L. C. H., Kariger, P., Hidrobo, M. & Gertler, P. J. Socioeconomic gradients in child development in very young children: evidence from India, Indonesia, Peru, and Senegal. *Proc Natl Acad Sci U S A* **109 Suppl 2**, 17273–17280 (2012).

10. Small, J. W., Hix-Small, H., Vargas-Baron, E. & Marks, K. P. Comparative use of the Ages and Stages Questionnaires in low- and middle-income countries. *Dev Med Child Neurol* **61**, 431–443 (2019).
11. Radloff, L. S. The CES-D Scale: A Self-Report Depression Scale for Research in the General Population. *Applied Psychological Measurement* **1**, 385–401 (1977).
12. Cohen, S., Kamarck, T. & Mermelstein, R. A global measure of perceived stress. *J Health Soc Behav* **24**, 385–396 (1983).
13. Garcia-Moreno, C. *et al.* WHO multi-country study study on women's health and domestic violence against women: initial results on prevalence, health outcomes and women's responses. (World Health Organization, 2005).
14. Lin, A., Mertens, A., Li, A., Butzin-Dozier, Z. & Tan, S. WASH Benefits Bangladesh Child Stress and Child Development Analysis Plan. (2021).
